# Supplementary material
Source: MDPI journal article supplement (https://www.mdpi.com/1999-4907/8/4/113)
Supplement: s1 [file s1]

Supplementary Material

**S1.** Material and methods of Román Dobarco (unpublished data).

Study Areas

We selected sampling sites in southern (Cedar Mountain) and northern Utah (Franklin Basin). Furthermore, the different geographic and abiotic settings allow us to investigate the origin of these differences in stabilized SOC as well as the generality of patterns across a range of conditions. Cedar Mountain (CM) is a high elevation plateau (1800–3200 m) located within the Colorado Plateau region of southwestern Utah. Forest vegetation is dominated by trembling aspen, whereas subalpine fir (*Abies lasiocarpa* (Hook.) Nutt.), Douglas fir (*Pseudotsuga menziesii* (Mirb.) Franco), and white fir (*Abies concolor* (Gordon & Glend.) Lindl. ex Hildebr.) are scarce in the landscape, forming mixed or pure stands at the edges of the plateau or northern slopes. Given the relatively recent settlement history of the state, there are no records on historical land use and vegetation cover for Cedar Mountain, but these aspen stands have been described as stable (i.e., self-regenerating climax vegetation), with an average age of mature aspen trees of 87 (±23 s.d.) years old measured in this area [1]. Mean annual precipitation is 812 mm, mostly as snowfall between October and April and monsoonal storms in the late summer. Average monthly air temperature ranges from −3.8 °C in December to 15.5 °C in July. Soil types are commonly Alfisols or Mollisols, developed predominantly on sedimentary rock (sandstone, siltstone, mudstone, carbonaceous shale) and igneous rock (basalt). Franklin Basin (FB) is a montane-subalpine area (1770–3030 m) located between the Bear River. Range and the Wasatch Range in the central Rocky Mountains, distributed between northeastern.

Utah and southeastern Idaho. Forest ecosystems are represented by trembling aspen and mixed conifer stands of Douglas fir, subalpine fir, and limber pine (*Pinus flexilis* E. James). During the late 1800s, intense logging and frequent fires favoured the establishment of pure aspen stands in a forest that was dominated by mixed and conifer stands in the early 1800s. Moister climate, moderate sheep grazing, and fire suppression during the 20th century created favorable conditions for conifer encroachment. The precipitation regime is snow dominated, with a mean annual precipitation of 1197 mm. Monthly average air temperature ranges between −6.9 °C in December and 16.4 °C in July. Soils are commonly Alfisols and Mollisols, developed on limestone or quartzite sandstone.

Sampling Design

Two sampling designs were used in this study, using overstory vegetation as a categorical variable in the first, and as a continuous variable in the second. For the first design, hereafter referred to as “transects”, four sites at CM and two sites at FB were selected in mixed aspen and conifer stands. Three transects were laid at each site, within a minimum distance of 20 m from each other. Within each transect, two soil cores (5 cm of diameter; 0–15 cm depth) were collected in the mineral soil beneath aspen, mixed, and conifer cover in similar conditions of slope, elevation, and aspect, and divided into 5 cm sections.

The second design investigated the changes in SOC chemical composition along the continuum from pure aspen to pure coniferous stands, and hereafter will be named “plots”. A total of 24 plots of 10-m radius were located in five different sites at CM. Five soil cores (5 cm in diameter; 0–15 cm depth) per plot were combined into a composite sample to represent the influence of stand composition and structure. Species, status (i.e., dead or alive), and diameter at breast height (i.e., stem diameter at 1.30 m in height) were recorded for all trees of diameter bigger than 3 cm. Stand measurements were used to calculate live basal area (LBA) by species (m2·ha−1) and aspen contribution to LBA (LBA aspen %).

Laboratory Analyses

Transect middle core sections (5–10 cm) were oven dried at 105 °C for 24 hours and sieved (2-mm mesh). Transect (0–5 cm) and composite plot samples (0–15 cm) were sieved (2-mm sieve) and air dried. Organic-free mineral matrix samples (MM) (0–15 cm plots, 5–10 cm transects) were obtained using sodium hypochlorite (NaOCl) (6%) at room temperature in three consecutive extraction cycles of 12-12-6 hours as described in [2] following a modification of Kaiser et al. [3]. A simplified fractionation method consisting of wet sieving and electrostatic attraction was used to separate the mineral-associated SOC and light fraction (LF) as described in [4]. This procedure yielded three fractions: free and occluded LF, mineral-associated SOC in the silt and clay fraction (<53 μm), and mineral-associated SOC in the sand size fraction (>53 μm). The latter was not included in the spectroscopic analysis because its contribution to SOC was <10% [4]. Bulk soil (BS) samples (transects 5–10 cm, plots 0–15 cm), MM, MoM, and LF samples were finely ground with mortar and pestle and scanned with FTIR-ATR (Nicolet 6700, Thermo-Fisher, Pittsburgh, PA, USA). Each spectrum was composed of 500 scans and recorded from 4000 to 650 cm–1 at 8 cm–1 intervals, since these settings provide the optimal combination between peak resolution and peak heights for these types of samples. Three replicates per sample were scanned and aggregated following automatic baseline and diamond-ATR corrections.

Spectral Processing and Statistical Analysis

All spectra were visualized, processed, and analyzed using Omnic 7.1 (Thermo Electron Corp., Waltham, MA) and the R package ChemoSpec. FTIR spectra of mineral soil samples include the signal of the soil mineral matrix, requiring subtraction of the MM spectra to obtain the organic matter spectra (OM). Removal of OM with NaOCl has a minimal effect on the structure of the mineral phase; therefore, spectral features attributed to mineral particles (e.g., 900–600 cm–1) should be similar in both BS and MM spectra. We calculated the variance between MM and BS spectra from transect samples with Omnic 7.1 to identify the peak with the lowest variability in the region 900–600 cm–1 independently from the organic matter content. The height of the peak at 797 cm–1 was used to normalize the MM spectra, followed by spectral subtraction with the formulae:

*c*  *HBS*797 */ HMM*797

*OM* *BS* *cMM*

where HBS797 is the corrected peak height (i.e., height measured from a baseline fitted between 740 cm–1–715 cm–1) at 797 cm–1 from the BS spectra, and HMM797 the corrected peak height at 797 cm–1 from the MM spectra. The OM, LF, and MoM spectra exhibited prominent peaks between 2500–1900 cm–1 which may be overtones of aromatic compound-C, but more likely indicated asymmetric thiocyanate (N=C=S) stretch (1975 cm–1), isothiocyanate (R-N=C=S) doublets (2029 cm–1 and 2097 cm–1), and the “Fermi doublet” of carbon dioxide (2159 cm–1) [5]. The region 2700–1700 cm–1 was excluded from the analysis because the carbon dioxide peak dominated the region and could influence peak height and width of other organic compounds. Functional groups were assigned to spectral regions based on FTIR literature on humic substances and metal-humic complexes, organo-clay complexes, peat, forest floor, forest mineral soil or arable soils, and SOC fractions. Main functional groups identified in the spectra included aliphatic C (i.e., 2920, 2850, and 1165 cm–1), "carboxylate" group (stretching asymmetric vibrations of C=O from acids, esters, ketones, quinones, and aromatic C=C stretching vibrations) (i.e., 1648 and 1636 cm–1), amide and aromatic C (i.e., 1558, 1541, 1521, and 1508 cm–1), polysaccharides, C-O groups (esters, ethers, phenols, acid groups), and Si-O bonds from quartz and clay minerals (i.e, 1087, 1034, and 1004 cm–1).

Principal component analysis (PCA) was performed with ChemoSpec on OM, MoM, and LF spectra to visualize clusters of similar spectral characteristics within same substrate type (i.e., OM, LF, and MoM). We tested the effect of overstory vegetation on the normalized height of spectral peaks, relative peak heights, the polysaccharides to aromatic C ratio (i.e., A1087/ΣA1500), and polysaccharides to aliphatic C ratio (i.e., A1087/A2920) of LF and MoM spectra. The relative peak height is obtained dividing each peak height by the sum of all peaks (i.e., rA1648 = A1648/ΣA1004-2920). While the normalized peak height (i.e. absorbance divided by the organic C concentration of MoM samples) is related to the concentration of functional groups, the relative peak height informs on the relative contribution of these functional groups to the soil sample.

The effect of vegetation on these metrics was tested with linear mixed effects (LME) models. In transect spectra, vegetation type was treated as a fixed factor, and site and transect as random effect factors. For plot spectra, aspen contribution to LBA (% aspen LBA) was treated as a fixed effect factor, and site as a random factor. LME models were applied with the R package lmerTest. The *p*-values of fixed effects are determined with F test based on Sattethwaite’s approximation of degrees of freedom, and the random effects with likelihood ratio test.

References

1. Rogers, P.C.; Leffler, A.J.; Ryel, R.J. Landscape assessment of a stable aspen community in Southern Utah, USA. *For. Ecol. Manage.* **2010**, *259*, 487–495.
2. Dobarco, M.R.; Van Miegroet, H.; Gruselle, M.-C.; Bauhu, J. Predicting tree species origin of soil organic carbon with near-infrared reflectance spectroscopy. *Soil Sci. Soc. Am. J.* **2014**, *78*, s23–s34.
3. Kaiser, K.; Eusterhues, K.; Rumpel, C.; Guggenberger, G.; Kögel-Knabner, I. Stabilization of organic matter by soil minerals—Investigations of density and particle-size fractions from two acid forest soils. *J. Plant Nutr. Soil. Sci.* **2002**, *165*, 451–459.
4. Román Dobarco, M.; Van Miegroet, H. Soil organic carbon storage and stability in the aspen-conifer ecotone in montane forests in Utah State, USA. *Forests* **2014**, *5*, 666–688.
5. Raab, T.K.; Lipson, D.A. The rhizosphere: A synchrotron-based view of nutrient flow in the root zone. *Dev. Soil Sci.* **2010**, *34*, 171–198.
